# Supplementary material
Source: PubMed Central journal article supplement (PMC5987944)
Supplement: JCB709709_supplementary_figure.pdf [file JCB709709_supplementary_figure.pdf]

## INS exposure after i.c. administration

Left hemi > Right hemi

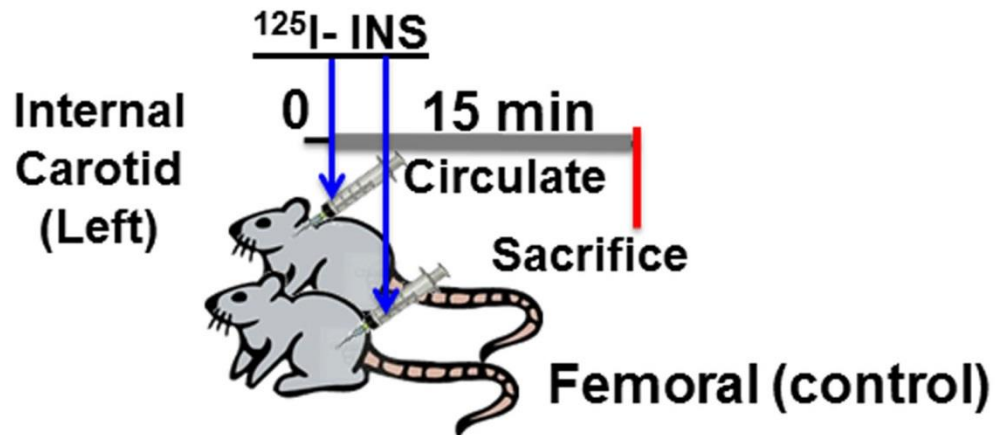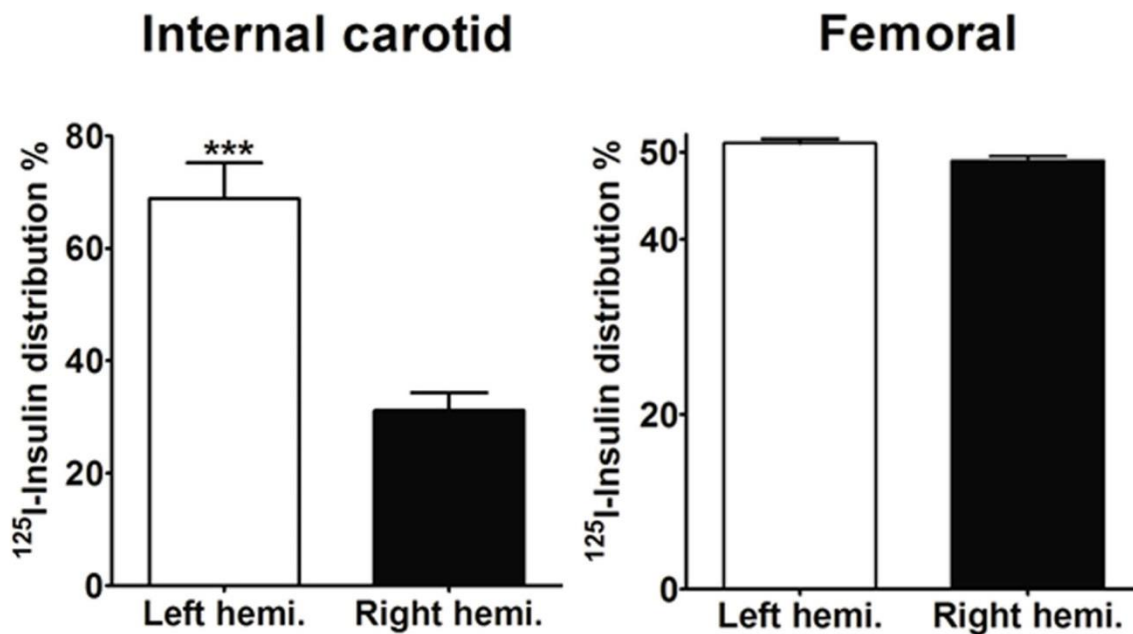

**Supplementary Figure 1: Determination of <sup>125</sup>I-Insulin distribution in brain.** A 100  $\mu$ Ci dose of <sup>125</sup>I-Insulin was administered via left internal carotid artery in B6SJLF1 mice. The animals were transcardially perfused with PBS after 15 min; left and right brain hemispheres were collected; and the radioactivity in each hemisphere was measured in the gamma

counter. The radioactivity in each brain hemisphere is plotted as a percentage of the total brain radioactivity. Data is Mean  $\pm$  S.D. (n = 4). Alternatively, 100  $\mu$ Ci of  $^{125}$ I-Insulin was administered via femoral vein and the accumulation of radioactivity in each hemisphere was determined and expressed as a percentage of the total brain radioactivity. Data is Mean  $\pm$  S.D. (n = 4). \*\*\* p < 0.0005: Student's t-test.
